# Supplementary material for: Percentile-based grain size distribution analysis tools (GSDtools) – estimating confidence limits and hypothesis tests for comparing two samples
Source: Copernicus journal article supplement (doi:10.5194/esurf-7-789-2019), 2019-09-02
Supplement: Supplementary file 1 [file esurf-7-789-2019-supplement.zip]

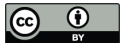

## *Supplement of*

# **Percentile-based grain size distribution analysis tools (GSDtools) – estimating confidence limits and hypothesis tests for comparing two samples**

**Brett C. Eaton et al.**

*Correspondence to:* Brett C. Eaton ([brett.eaton@ubc.ca](mailto:brett.eaton@ubc.ca))

- [esurf-7-789-2019-supplement-title-page.pdf](#)
- [GSDtools\\_demo\\_2019.nb.html](#)
- [GSDtools\\_spreadsheet.xlsx](#)

The copyright of individual parts of the supplement might differ from the CC BY 4.0 License.
